# Supplementary material for: Outcomes of bacillus Calmette–Guérin therapy without a maintenance schedule for high‐risk non‐muscle‐invasive bladder cancer in the second transurethral resection era
Source: PubMed Central journal article supplement (PMC9299795; doi:10.1111/iju.14761), 2021-12-11

# Supplementary Table. Treatment course of biopsy-positive patients

## Tumor residual case in protocol biopsy without visible tumor (N=7)

| Case | Age | Sex | Cytology   | Pathology at 1 <sup>st</sup> TUR | Pathology at protocol biopsy | Additional treatment                                    | Outcome              |
|------|-----|-----|------------|----------------------------------|------------------------------|---------------------------------------------------------|----------------------|
| 1    | 71  | M   | Atypical   | G3T1withCIS                      | CIS                          | 2 <sup>nd</sup> BCG→Chemotherapy for metastatic disease | Arrive with tumor    |
| 2    | 70  | M   | Negative   | G3T1withCIS                      | G2T4 (prostate invasion)     | Cystectomy                                              | Arrive without tumor |
| 3    | 55  | M   | Positive   | G3Ta                             | G3T4 (prostate invasion)     | Cystectomy                                              | Arrive without tumor |
| 4    | 69  | M   | Negative   | G3Ta with CIS                    | G3T1                         | Cystectomy                                              | Arrive without tumor |
| 5    | 43  | F   | Suspicious | G3Ta with CIS                    | G3T1                         | Cystectomy                                              | Arrive without tumor |
| 6    | 59  | M   | Suspicious | CIS                              | G3T1                         | Cystectomy                                              | Arrive without tumor |
| 7    | 68  | M   | Negative   | G3T1                             | G3Ta                         | Cystectomy                                              | Cancer death         |

## Tumor residual case in protocol biopsy with visible tumor (N=11)

| Case | Age | Sex | Cytology | Pathology at 1 <sup>st</sup> TUR | Pathology at protocol biopsy    | Additional treatment                | Outcome                   |
|------|-----|-----|----------|----------------------------------|---------------------------------|-------------------------------------|---------------------------|
| 1    | 67  | M   | Negative | G2Ta                             | G2Ta                            | Observe                             | Arrive without tumor      |
| 2    | 64  | M   | Atypical | G3T1                             | G3T1                            | Cystectomy                          | Arrive without tumor      |
| 3    | 80  | M   | Negative | G3T1                             | G3T1                            | Observe                             | Metastasis (no treatment) |
| 4    | 69  | M   | Atypical | CIS                              | G3T1                            | 2nd BCG                             | Arrive without tumor      |
| 5    | 75  | M   | Negative | G2Ta                             | G2Ta                            | 2nd BCG                             | Arrive without tumor      |
| 6    | 83  | F   | Negative | G2T1                             | G3T1                            | Observe                             | Arrive without tumor      |
| 7    | 82  | M   | Negative | G3Ta with CIS                    | G3T2+ low grade B-cell lymphoma | Chemoradiation                      | Death from other causes   |
| 8    | 64  | F   | Atypical | G3T1                             | G3T1                            | Cystectomy                          | Arrive without tumor      |
| 9    | 64  | F   | Negative | G3T1                             | G3T1                            | Cystectomy                          | Unknown                   |
| 10   | 84  | F   | Negative | G2Ta                             | G2Ta                            | MMC→G2Ta recurrence →TUR            | Arrive without tumor      |
| 11   | 42  | M   | Negative | G3T1                             | High Ta                         | Observe→G3T1 recurrence →cystectomy | Arrive without tumor      |

Supplementary Figure. Kaplan-Meier survival analysis displaying times to disease recurrence in the group excluding concurrent CIS.

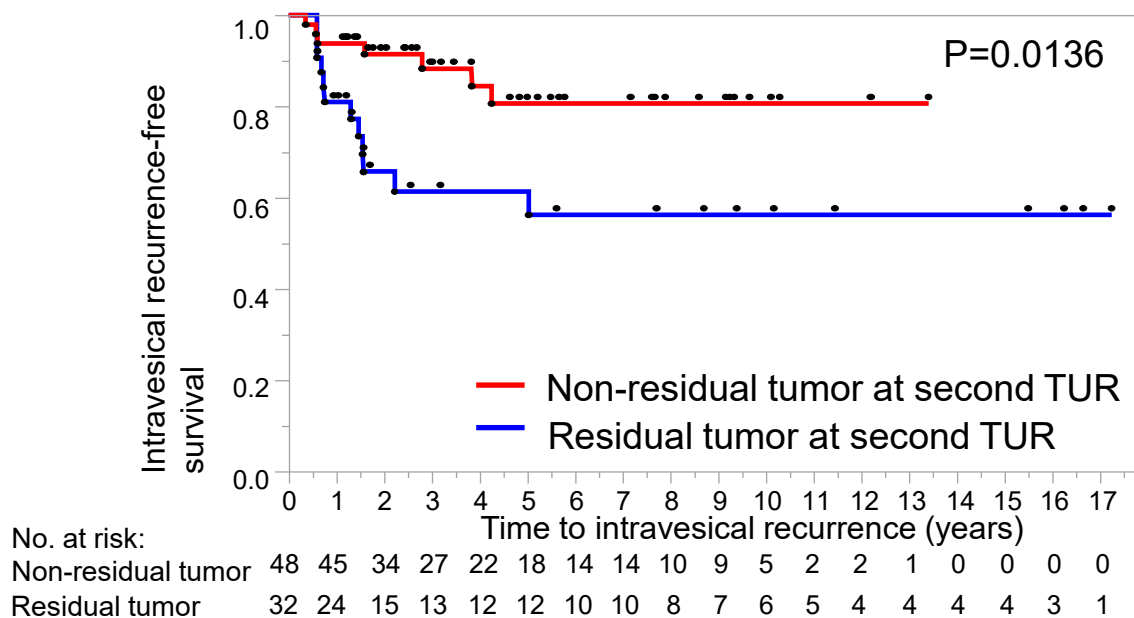

Supplement: IJU-29-251-s001.pdf [file IJU-29-251-s001.pdf]
